# Supplementary material for: Analysis of the HD-Zip I transcription factor family in Salvia miltiorrhiza and functional research of SmHD-Zip12 in tanshinone synthesis
Source: PeerJ. 2023 Jun 27;11:e15510. doi: 10.7717/peerj.15510 (PMC10312201; doi:10.7717/peerj.15510)
Supplement: Data S1 [file peerj-11-15510-s001.xlsx]

## Sheet: Sheet1
ABA														PEG														NaCl
	CK			3h			6h			9h					ck			3h			6h			9h					ck			3h			6h			9h
actin	23.2009	22.7598	22.7564	24.4721	24.7258	24.1449	23.5716	23.5668	23.4874	23.4171	23.4955	23.4454		actin	18.3591	18.3249	18.276	22.4447	18.9121	19.0667	18.6882	19.2142	18.931	19.0091	19.2333	18.7436		actin	19.4714	18.849	19.1394	20.2623	19.244	19.423	21.5454	19.366	19.8676	20.3069	19.5176	19.6154
SmHD-Zip12	22.8598	22.8843	22.9798	18.1826	18.1606	18.1405	18.3338	18.1681	18.0377	17.9373	18.3264	18.1589		SmHD-Zip12	24.3007	24.5223	24.8251	26.758	23.4302	23.3832	22.0392	22.755	21.8595	20.6855	20.5318	20.5267		SmHD-Zip12	23.9558	23.2027	23.8996	20.3985	19.1938	19.1557	20.0218	18.5041	18.9414	19.9607	18.9725	19.3241
	-0.341122	0.124432	0.223388	-6.28947	-6.56517	-6.00444	-5.23787	-5.39874	-5.44972	-5.47986	-5.16909	-5.28649			5.94156	6.19743	6.54916	4.31333	4.51813	4.31648	3.35103	3.54086	2.92853	1.67631	1.29842	1.78306			4.48439	4.35372	4.76015	0.136213	-0.0502435	-0.267314	-1.52367	-0.86198	-0.92614	-0.346128	-0.545129	-0.291354
				-5.94834	-6.6896	-6.22783	-4.89675	-5.52317	-5.6731	-5.13873	-5.29352	-5.50988						-1.62823	-1.6793	-2.23269	-2.59053	-2.65657	-3.62063	-4.26525	-4.89901	-4.76611						-4.34818	-4.40396	-5.02747	-6.00806	-5.2157	-5.68629	-4.83052	-4.89884	-5.05151
				61.749	103.222	74.9485	29.7899	45.9876	51.024	35.23	39.2201	45.5659						3.09134	3.20273	4.70009	6.0232	6.30533	12.3004	19.2295	29.8366	27.2108						20.3672	21.1701	32.6151	64.3587	37.1604	51.4926	28.4532	29.8331	33.1631
	CK			3h			6h			9h					ck			3h			6h			9h					ck			3h			6h			9h
actin	18.6119	18.6482	18.687	18.3551	18.164	18.2444	18.6028	18.562	18.2537	18.5351	18.6333	18.7038		actin	18.3074	18.3729	18.4152	21.6585	21.293	21.4764	18.8275	18.5708	18.7055	19.0277	18.9837	19.0165		actin	18.5862	18.425	18.4156	19.0062	18.93	19.0398	19.0795	19.1751	19.1444	19.2414	19.0115	19.0643
SmHD-Zip20	23.2203	23.3968	23.1618	19.7793	19.9113	19.7503	20.8895	20.7452	20.6272	21.0816	20.8624	21.0709		SmHD-Zip16	32.5514	33.7743	33.1313	32.0398	32.4843	32.2397	31.0867	31.0138	30.1205	32.6213	32.4625	32.0622		SmHD-Zip17	34.7539	33.5695	34.3479	34.2287	32.4859	36.122	32.5588	31.7282	31.6908	34.4204	36.3357	36.8506
	4.60837	4.74854	4.47478	1.42413	1.74732	1.50593	2.2867	2.18321	2.3735	2.54656	2.22909	2.36703			14.244	15.4014	14.716	10.3813	11.1912	10.7634	12.2592	12.443	11.4151	13.5936	13.4788	13.0457			16.1678	15.1445	15.9323	15.2225	13.5559	17.0822	13.4794	12.5531	12.5463	15.1789	17.3242	17.7863
				-3.18424	-3.00122	-2.96885	-2.32166	-2.56534	-2.10128	-2.06181	-2.51946	-2.10775						-3.86263	-4.21011	-3.9527	-1.98481	-2.95831	-3.301	-0.650369	-1.92256	-1.67039						-0.945287	-1.58861	1.14983	-2.68838	-2.5914	-3.386	-0.988835	2.17971	1.85395
				9.08971	8.0068	7.82913	4.99908	5.91894	4.29089	4.1751	5.73366	4.31019						14.5468	18.5084	15.4839	3.95812	7.77215	9.85597	1.56957	3.79095	3.183						1.92557	3.0076	0.450679	6.44591	6.02684	10.4541	1.98458	0.22072	0.276634
	CK			3h			6h			9h					ck			3h			6h			9h					ck			3h			6h			9h
actin	18.8037	18.5812	18.6198	18.4741	18.4012	18.5962	18.8215	18.5573	18.9244	18.9763	18.9593	18.9202		actin	18.4724	18.4127	18.425	19.04	19.365	19.2285	18.8783	18.8596	18.785	19.084	19.2799	19.1601		actin	19.251	18.8355	19.1221	20.1484	19.3487	19.2391	21.4656	19.2269	19.9195	19.9947	19.3958	19.8581
SmHD-Zip25	19.2495	19.2274	19.0797	16.0102	15.9725	16.2382	16.3865	16.2472	16.3692	16.788	16.6126	16.8985		SmHD-Zip17	32.6956	32.1074	32.2823	32.0135	32.0236	32.0439	31.8523	30.6372	30.6858	31.4648	32.0082	31.7721		SmHD-Zip20	23.1006	22.0581	22.6734	20.5376	19.9673	20.1939	23.3037	20.5916	20.8874	21.9773	21.2348	21.6601
	0.445782	0.646152	0.459879	-2.46387	-2.42868	-2.35802	-2.4349	-2.31007	-2.55523	-2.18827	-2.34671	-2.0217			14.2232	13.6947	13.8573	12.9735	12.6586	12.8154	12.974	11.7775	11.9008	12.3808	12.7284	12.612			3.84962	3.22264	3.55132	0.389184	0.618551	0.954849	1.83802	1.36473	0.967892	1.98259	1.83906	1.80206
				-2.90965	-3.07483	-2.8179	-2.88068	-2.95623	-3.01511	-2.63406	-2.99286	-2.48158						-1.24973	-1.03613	-1.04189	-1.24918	-1.91717	-1.95646	-1.8424	-0.96635	-1.24529						-3.46043	-2.60409	-2.59647	-2.01159	-1.85791	-2.58342	-1.86702	-1.38358	-1.74925
				7.51435	8.42591	7.05135	7.365	7.76091	8.08424	6.20769	7.96051	5.58508						2.37797	2.05072	2.05892	2.37706	3.77681	3.88108	3.58606	1.95389	2.37067						11.0076	6.08006	6.04803	4.03227	3.62481	5.9936	3.64779	2.60914	3.36185
															ck			3h			6h			9h					ck			3h			6h			9h
														actin	18.2949	18.3796	18.3976	19.0977	19.0222	19.0483	18.8992	18.8877	19.0929	18.7032	18.8995	18.8414		actin	19.1657	18.769	18.9362	19.6415	18.9412	19.1525	21.5424	20.264	19.6176	19.9884	19.2542	19.5204
														SmHD-Zip25	19.0501	19.1297	19.0192	18.2787	18.5024	18.6549	18.2104	18.116	18.2005	17.815	17.9459	17.8338		SmHD-Zip25	19.8174	19.1191	19.8978	17.129	16.4798	16.5502	18.1522	16.6717	16.8613	17.6337	16.9378	17.622
															0.755237	0.750102	0.621638	-0.819003	-0.519812	-0.393467	-0.688809	-0.771651	-0.892406	-0.888216	-0.95353	-1.00764			0.651673	0.3501	0.961613	-2.51245	-2.46143	-2.6023	-3.39015	-3.59229	-2.75631	-2.35467	-2.3164	-1.8984
																		-1.57424	-1.26991	-1.0151	-1.44405	-1.52175	-1.51404	-1.64345	-1.70363	-1.62928						-3.16413	-2.81153	-3.56391	-4.04182	-3.94239	-3.71792	-3.00634	-2.6665	-2.86001
																		2.97779	2.41147	2.02105	2.72083	2.8714	2.85609	3.12413	3.2572	3.09359						8.9639	7.02031	11.8262	16.4706	15.3737	13.1585	8.03523	6.34888	7.2602

## Sheet: Sheet2
	Dihydrotanshinone I			Cryptotanshinone			Tanshinone Ⅰ			Tanshinone ⅡA
	retention time	peak area		retention time	peak area		retention time	peak area		retention time	peak area
WT	26.401	10542		32.413	23467		33.431	11410		41.441	10471
	26.438	10104		32.431	21945		33.439	9568		41.538	4833
	26.4	11000		32.388	20529		33.44	8140		41.434	5858
EV	26.432	4972		32.398	17668		33.438	17901		41.439	29309
	26.395	7798		32.372	16415		33.401	17891		41.444	28330
	26.38	7300		32.347	18668		33.388	19510		41.392	31070
OE1	26.398	14501		32.383	52468		33.402	31650		41.424	75100
	26.365	14496		32.35	48499		33.377	26564		41.382	73490
	26.369	17830		32.356	55258		33.369	29883		41.368	83796
OE2	26.415	59555		32.406	143765		33.438	116928		41.444	192917
	26.439	65064		32.418	144010		33.461	114372		41.472	191887
	26.433	64745		32.428	143934		33.456	110468		41.479	194291
OE3	26.393	20289		32.378	39358		33.422	48392		41.431	92204
	26.355	22032		32.326	40556		33.376	48114		41.35	92068
	26.36	20054		32.331	40925		33.374	48023		41.343	93290
OE4	26.379	25609		32.356	44101		33.387	60972		41.396	79230
	26.352	26226		32.309	45743		33.325	59317		41.333	77751
	26.451	23631		32.429	40243		33.439	56735		41.456	72842

## Sheet: Sheet3
	WT			EV			OE1			OE2			OE3			OE4
actin	18.0726	17.9472	18.0314	18.7839	17.6758	18.6913	18.5679	18.4693	18.5636	19.6816	19.5316	19.6369	19.0401	19.0648	19.0367	19.0474	19.0814	19.068
SmCPS2	21.8724	21.9292	22.0286	21.7928	21.5097	21.8872	20.9545	20.7429	20.6876	20.6574	20.7923	20.7713	22.1742	22.1101	22.1872	20.8198	20.695	20.982
	3.79976	3.98202	3.99719	3.00888	3.83381	3.19587	2.38662	2.27361	2.12394	0.975775	1.26074	1.13438	3.13404	3.04531	3.15053	1.77246	1.61352	1.91404
				-0.790877	-0.148209	-0.801314	-1.41314	-1.70842	-1.87325	-2.82398	-2.72128	-2.86281	-0.665722	-0.936712	-0.846655	-2.0273	-2.36851	-2.08315
				1.73013	1.10819	1.74269	2.66317	3.26802	3.66356	7.08115	6.5946	7.27432	1.58636	1.91416	1.79833	4.07641	5.16406	4.2373
	WT			EV			OE1			OE2			OE3			OE4
actin	18.0726	17.9472	18.0314	18.7839	17.6758	18.6913	18.5679	18.4693	18.5636	19.6816	19.5316	19.6369	19.0401	19.0648	19.0367	19.0474	19.0814	19.068
SmAACT	19.0731	18.6557	18.9034	19.9632	19.659	19.9269	17.6427	17.6874	17.7039	18.5316	18.603	18.8683	18.059	17.9474	17.9782	17.9626	17.7681	18.055
	1.00048	0.708507	0.871969	1.17929	1.98317	1.23555	-0.925198	-0.781831	-0.859735	-1.14997	-0.928541	-0.768587	-0.981077	-1.11737	-1.05852	-1.08471	-1.31339	-1.01299
				0.178804	1.27466	0.235072	-1.92568	-1.49034	-1.7317	-2.15045	-1.63705	-1.64056	-1.98156	-1.82588	-1.93049	-2.0852	-2.0219	-1.88496
				0.883435	0.413323	0.849642	3.79916	2.80955	3.3212	4.43967	3.11029	3.11786	3.9492	3.54522	3.81185	4.24333	4.06117	3.69342
	WT			EV			OE1			OE2			OE3			OE4
actin	17.9626	18.2372	18.0314	18.7839	17.6758	18.6913	17.5679	17.9693	17.2036	18.8816	18.0516	18.3669	18.5601	18.7848	18.3067	18.1174	18.2314	18.228
SmGGPPS	24.1591	23.9992	24.015	25.4465	24.6546	25.0756	20.164	19.9979	19.7501	19.8723	18.9947	19.4551	21.2432	20.9877	21.0689	19.6782	19.5557	19.7032
	6.19649	5.76196	5.98361	6.66257	6.97877	6.3843	2.59606	2.02862	2.54646	0.990757	0.94316	1.08821	2.68312	2.20291	2.76223	1.5609	1.32421	1.47527
				0.466082	1.21681	0.400694	-3.60044	-3.73334	-3.43715	-5.20573	-4.8188	-4.8954	-3.51337	-3.55905	-3.22138	-4.63559	-4.43775	-4.50834
				0.723928	0.430233	0.757494	12.1294	13.2999	10.8314	36.9048	28.223	29.7621	11.419	11.7863	9.3268	24.8572	21.6719	22.7586
	WT			EV			OE1			OE2			OE3			OE4
actin	18.0726	17.9472	18.0314	18.7839	17.6758	18.6913	18.5679	18.4693	18.5636	19.6816	19.5316	19.6369	19.0401	19.0648	19.0367	19.0474	18.7814	19.068
SmDXS	21.3789	21.628	21.6399	21.6487	21.7836	21.6624	20.2423	20.4087	20.2863	20.041	20.1192	20.0748	20.6428	20.8285	20.8021	20.9612	20.5696	20.8397
	3.30634	3.68078	3.60849	2.86484	4.1078	2.97109	1.67435	1.93946	1.72268	0.35937	0.587644	0.437931	1.60272	1.76375	1.76535	1.9138	1.78818	1.77174
				-0.4415	0.427026	-0.637398	-1.63198	-1.74132	-1.88581	-2.94697	-3.09313	-3.17056	-1.70362	-1.91703	-1.84314	-1.39253	-1.89259	-1.83675
				1.35802	0.743793	1.55552	3.09939	3.3434	3.6956	7.71126	8.53346	9.00395	3.25716	3.77645	3.5879	2.62539	3.71302	3.57204
	WT			EV			OE1			OE2			OE3			OE4
actin	17.2108	17.409	17.5103	17.9869	17.3882	17.2827	18.9033	17.6776	18.2098	18.9668	19.109	18.1892	18.3296	18.617	18.416	18.1707	18.1539	18.0509
SmCYP76AK1	20.0486	20.6767	20.3709	20.998	20.0201	19.9691	20.3058	19.8081	20.1143	19.7369	20.2439	19.4663	19.3913	20.403	19.5013	19.7111	20.3422	19.6411
	2.83779	3.26768	2.86065	3.01113	2.63193	2.68645	1.40251	2.13048	1.90454	0.770177	1.13486	1.27714	1.06168	1.78601	1.08533	1.54043	2.18836	1.5902
				0.17334	-0.635746	-0.174193	-1.43527	-1.1372	-0.956108	-2.06761	-2.13281	-1.5835	-1.77611	-1.48167	-1.77531	-1.29736	-1.07932	-1.27045
				0.886787	1.55374	1.12833	2.70433	2.19953	1.94007	4.19191	4.38572	2.99697	3.42501	2.79272	3.42313	2.45778	2.11304	2.41237
	WT			EV			OE1			OE2			OE3			OE4
actin	20.0486	20.6767	20.3709	20.998	20.0201	19.9691	20.3058	19.8081	20.1143	19.7369	20.2439	19.4663	19.3913	20.403	19.5013	19.7111	20.3422	19.6411
SmCYP76AH3	22.0045	22.2236	22.7123	22.274	22.4371	22.0325	20.2325	19.2322	19.9697	19.673	19.8465	19.0557	20.1119	20.0607	20.0731	20.6727	20.2933	20.5049
	4.79368	4.81461	5.20207	4.28709	5.04889	4.74985	1.32919	1.55451	1.75992	0.706276	0.737467	0.866574	1.78231	1.44364	1.65708	2.50199	2.13938	2.454
				-0.506589	0.234273	-0.452214	-3.46449	-3.2601	-3.44214	-4.08741	-4.07715	-4.33549	-3.01137	-3.37098	-3.54499	-2.2917	-2.67523	-2.74807
				1.42069	0.850113	1.36814	11.0387	9.5805	10.869	16.9993	16.8789	20.1889	8.06332	10.3458	11.6721	4.89632	6.38742	6.71816
	WT			EV			OE1			OE2			OE3			OE4
actin	16.6961	16.5649	16.5701	16.2452	16.1319	16.5502	17.597	17.2632	17.6431	18.7048	18.201	17.8991	17.7583	17.0573	17.3192	17.6947	17.6215	17.1832
SmCYP76AH1	20.5421	20.8402	20.3471	20.6129	20.4266	21.1357	19.6664	19.3464	19.1472	19.789	19.2656	18.5741	19.7159	19.9304	19.5269	19.0979	19.394	18.8001
	3.84594	4.27534	3.77702	4.36767	4.29475	4.58555	2.06937	2.0832	1.50404	1.08421	1.06465	0.674951	1.9576	2.8731	2.2077	1.4032	1.77247	1.61681
				0.521738	0.0194029	0.80853	-1.77657	-2.19214	-2.27298	-2.76173	-3.2107	-3.10207	-1.88833	-1.40225	-1.56932	-2.44274	-2.50288	-2.16021
				0.696532	0.986641	0.570963	3.42611	4.56984	4.83322	6.78208	9.25797	8.58652	3.70208	2.64313	2.96765	5.43672	5.66815	4.4698
	WT			EV			OE1			OE2			OE3			OE4
actin	18.1359	18.0895	18.0695	18.3874	18.3785	18.3418	18.3191	18.5769	18.4031	19.416	19.0267	19.4564	18.9433	18.8627	19.0864	19.0979	19.0302	18.9897
SmCPS1	21.4547	21.4491	21.2941	20.7733	20.8362	20.7681	20.256	20.2394	20.2511	20.3031	20.3789	20.4203	21.5634	21.6345	21.6384	20.344	20.4229	20.3209
dct	3.31871	3.3596	3.22452	2.38593	2.4577	2.42633	1.93692	1.6625	1.84806	0.887135	1.35225	0.963889	2.62006	2.77183	2.55201	1.24608	1.39273	1.33123
				-0.932782	-0.901907	-0.798186	-1.38178	-1.6971	-1.37646	-2.43158	-2.00735	-2.26063	-0.698653	-0.587773	-0.67251	-2.07263	-1.96687	-1.89329
				1.90895	1.86853	1.73891	2.60591	3.24248	2.59631	5.39482	4.02043	4.79201	1.62299	1.50292	1.59384	4.20653	3.90919	3.71482
	WT			EV			OE1			OE2			OE3			OE4
actin	18.1359	18.0895	18.0695	18.3874	18.3785	18.3418	18.3191	18.5769	18.4031	19.416	19.3267	19.4564	18.9433	18.8627	19.0864	19.0979	19.0302	18.9897
SmIDS	21.3812	21.213	21.5292	21.6741	21.6682	21.7475	20.5179	20.6343	20.5837	21.2083	21.1994	21.2534	21.5045	21.5174	21.4813	21.5433	21.1397	21.1623
	3.24529	3.12355	3.45962	3.2867	3.28972	3.40568	2.19875	2.05738	2.1806	1.79237	1.87274	1.79704	2.56117	2.65475	2.39491	2.44534	2.10956	2.17265
				0.0414106	0.16616	-0.053937	-1.04654	-1.06617	-1.27902	-1.45292	-1.25082	-1.66258	-0.684115	-0.468804	-1.06471	-0.799948	-1.014	-1.28697
				0.971704	0.891212	1.03809	2.06556	2.09387	2.42674	2.73761	2.37976	3.16582	1.60672	1.38396	2.09174	1.74104	2.0195	2.44016
